# Supplementary material
Source: Springer Nature journal article supplement (https://www.springermedizin.de/resource/supplementary/12885_2011_3041_MOESM2_ESM.pdf/9462490)
Supplement: MOESM2 [file 9462490]

A.

+DAB/IL2

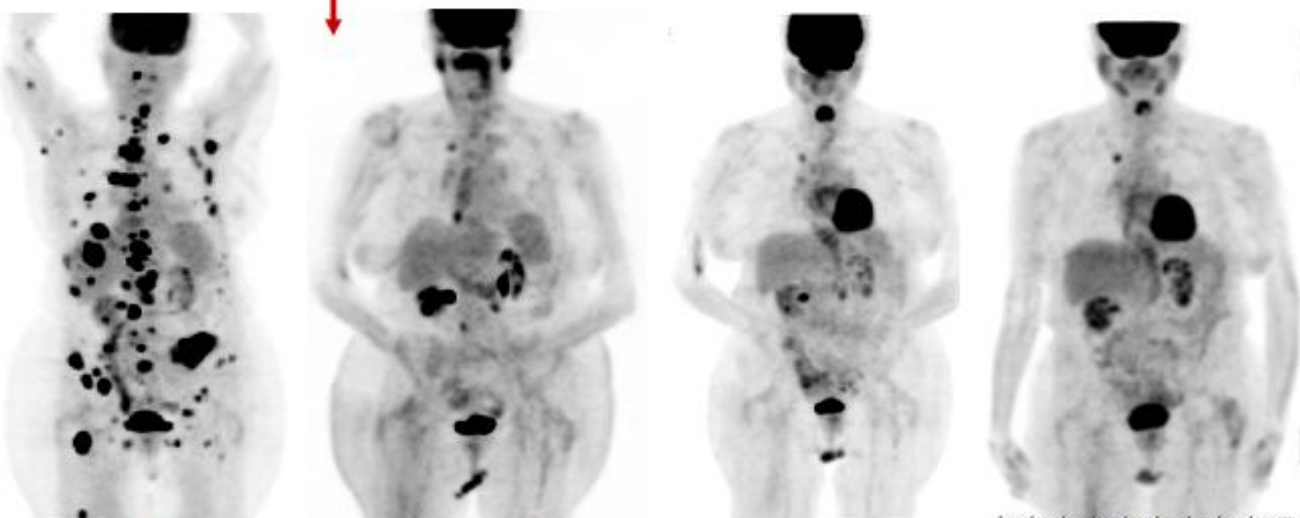

Baseline

+4 Months

+10 Months

+15 Months

B.

+DAB/IL2

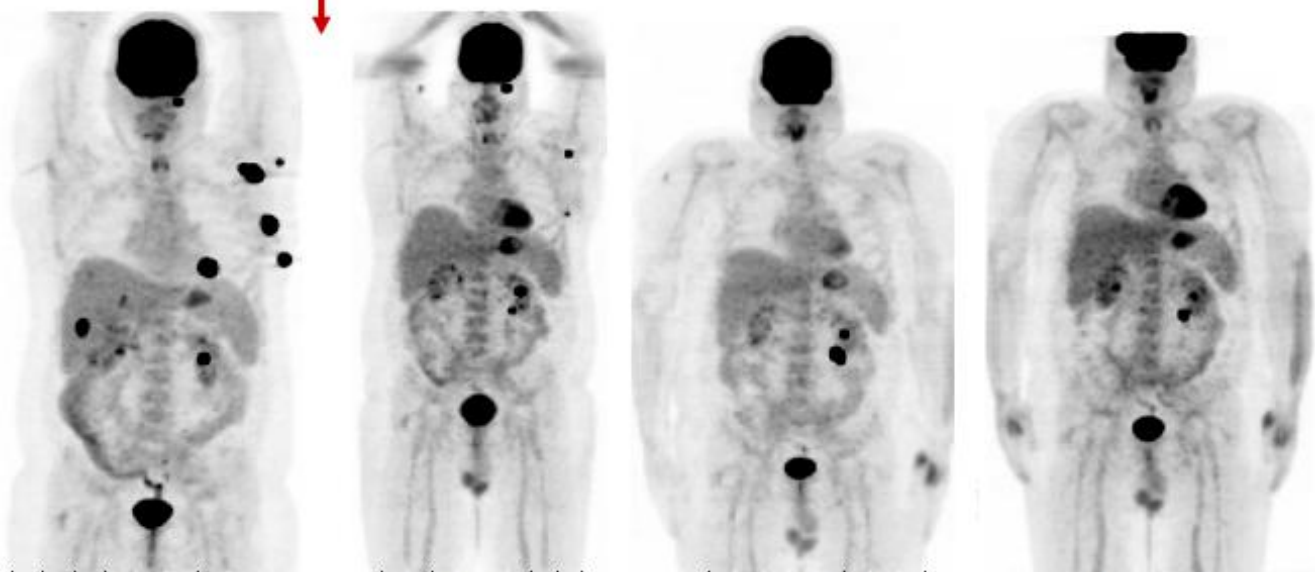

Baseline

+2 Months

+10 Months

+13 Months

C.

+DAB/IL2

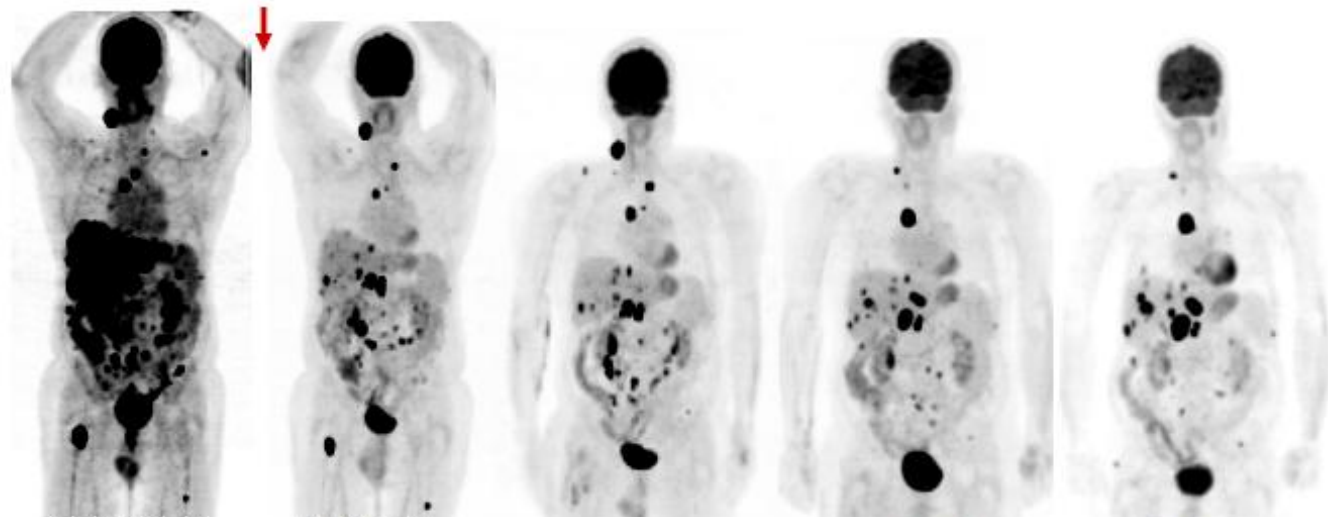

Baseline

+3 Months

+6 Months

+12 Months

+15 Months
